# Supplementary material for: Identification of Indicators for Preterm Birth Using Retinoid Metabolites
Source: MDPI journal article supplement (doi:10.3390/metabo11070443), 2021-07-07
Supplement: s1 [file s1]

Article

# Identification of potential biomarker of PTB using retinoid metabolites

**Young-Ah You <sup>1†</sup>, Soo-Yeon Hwang<sup>2†</sup>, Soo Min Kim <sup>1</sup>, Seojeong Park<sup>2</sup>, Ga In Lee<sup>3</sup>, Sunwha Park<sup>1</sup>, AbuZar Ansari<sup>1</sup>, Jeongae Lee<sup>4</sup>, Youngjoo Kwon<sup>2\*</sup> and Young Ju Kim <sup>1,3\*</sup>**

<sup>1</sup> Department of Obstetrics and Gynecology, College of Medicine and Ewha Medical Institute, Ewha Womans University, Seoul 07804, Republic of Korea; yerang02@naver.com (Y.-A.Y.), zeus\_0218@naver.com (S.M.K.), loveleee0102@gmail.com (G.I.L.) clarrissa@hanmail.net (S.P.), abu.zar.0313@outlook.com (A.A.),

<sup>2</sup> Department of Pharmacy, Ewha Womans University, Seoul 03760, Republic of Korea

<sup>3</sup> Graduate Program in System Health Science and Engineering, Ewha Womans University, Seoul, Republic of Korea

<sup>4</sup> Molecular Recognition Research Center, Korea Institute of Science and Technology, Seoul 02792, Korea

\* correspondence author: ykwon@ewha.ac.kr (Y.K.), kkyj@ewha.ac.kr (Y.J.K.)

† Equal contribution as first author

Received: date; Accepted: date; Published: date

Table S1. Clinical characteristics of subjects for analysis of untargeted metabolome profiles (n=21).

|                              | Term birth ( <i>n</i> = 10)<br>Median (IQR) | Preterm birth ( <i>n</i> = 11)<br>Median (IQR) | <i>p</i> -value |
|------------------------------|---------------------------------------------|------------------------------------------------|-----------------|
| Maternal age                 | 33.0 (4.8)                                  | 33.0 (4.8)                                     | 0.669           |
| GAS                          | 38.5 (1.6)                                  | 31.4 (7.4)                                     | < 0.00*         |
| Parity                       |                                             |                                                | 0.423           |
| Nulliparous, n               | 3                                           | 4                                              |                 |
| Multiparous, n               | 7                                           | 7                                              |                 |
| Gravidity                    |                                             |                                                | 0.237           |
| 0, n                         | 3                                           | 7                                              |                 |
| ≥ 1, n                       | 7                                           | 4                                              |                 |
| WBC ( × 10 <sup>3</sup> /ml) | 9.8 (2.9)                                   | 10.3 (8.4)                                     | 0.468           |
| C-reactive protein           | -                                           | 0.5 (0.9)                                      | -               |
| AST                          | 21.0 (7.3)                                  | 21.0 (3.0)                                     | 0.809           |
| ALT                          | 14.5 (3.8)                                  | 14.0 (9.0)                                     | 1.000           |
| AST/ALT ratio                | 1.4 (0.6)                                   | 1.4 (0.7)                                      | 0.918           |
| TC                           | 259.5 (29.0)                                | 253.0 (36.0)                                   | 0.512           |
| TG                           | 259.0 (115.5)                               | 178.0 (148.0)                                  | 0.114           |
| BUN                          | 7.0 (1.6)                                   | 6.0 (6.0)                                      | 0.863           |
| Creatinine                   | 0.7 (0.1)                                   | 0.6 (0.2)                                      | 0.223           |
| BUN/Creatinine ratio         | 10.1 (2.9)                                  | 10.1 (8.8)                                     | 0.705           |
| pregBMI                      | 25.2 (3.3)                                  | 25.0 (3.7)                                     | 0.029*          |
| GAD                          | 38.5 (1.6)                                  | 33.0 (8.6)                                     | < 0.001*        |
| Delivery mode                |                                             |                                                | 0.063           |
| Normal delivery, n           | 7                                           | 3                                              |                 |
| Cesarean section, n          | 3                                           | 8                                              |                 |
| Birth weight (Kg)            | 3.3 (0.3)                                   | 2.0 (1.5)                                      | < 0.001*        |
| Gender, n (%)                |                                             |                                                | 0.426           |
| Male, n                      | 7                                           | 7                                              |                 |
| Female, n                    | 3                                           | 4                                              |                 |
| APGAR 1min                   | 10.0 (0.0)                                  | 6.0 (6.0)                                      | < 0.001*        |
| APGAR 5min                   | 10.0 (0.0)                                  | 9.0 (3.0)                                      | 0.003*          |

Data were presented as Median (Interquartile range, IQR). \* Mann Whitney test, *p* < 0.05;

† $\chi^2$  test, *p* < 0.05. GAS, gestational age at sampling; PregBMI, body mass index at delivery; GAD, gestational age at delivery.

Table S2. Comparison of blood indices related retinoid metabolism between TB and PTB (n=59).

|                | Term Birth<br>(n=39) | Preterm birth<br>(n=20) | <i>p</i> -value |
|----------------|----------------------|-------------------------|-----------------|
| AST            | 16.92 ± 0.70         | 17.75 ± 1.38            | 0.554           |
| ALT            | 11.79 ± 1.17         | 12.95 ± 2.00            | 0.597           |
| AST/ALT        | 1.69 ± 0.09          | 1.62 ± 0.11             | 0.642           |
| TC             | 263.64 ± 7.07        | 257.75 ± 9.96           | 0.630           |
| TG             | 307.23 ± 24.90       | 264.85 ± 29.62          | 0.303           |
| BUN            | 8.41 ± 0.53          | 7.50 ± 0.77             | 0.328           |
| Creatinine     | 0.57 ± 0.02          | 0.50 ± 0.03             | 0.066           |
| BUN/Creatinine | 14.75 ± 0.56         | 15.60 ± 1.08            | 0.441           |

Data were presented as Mean ± SE. Student's t-test, AST, aspartate aminotransaminase; ALT, alanine aminotransferase; TC, total cholesterol; TG, triglyceride; BUN, blood urea nitrogen

Table S3. Ranked results of multivariate analysis on variable ions identified by UPLC-LTQ–Orbitrap MS.

| No. | RT_Mass        | Detected method | VIP value | p-value  | Change | Fold change(P/C) | Accurate Mass | Mass error(ppm) | Metabolic pathway                 |
|-----|----------------|-----------------|-----------|----------|--------|------------------|---------------|-----------------|-----------------------------------|
| 1   | 11.61_163.0094 | RP              | 2.66      | 1.51E-03 | ↑      | 7.41             |               |                 |                                   |
| 2   | 11.36_319.2058 | RP              | 2.41      | 3.60E-02 | ↑      | 1.94             | 319.2034      | 7.83            | Linoleic acid metabolism          |
| 3   | 10.92_274.2816 | RP              | 2.09      | 2.63E-02 | ↓      | 0.79             |               |                 |                                   |
| 4   | 5.96_90.5243   | RP              | 2.05      | 2.74E-02 | ↑      | 6.51             |               |                 |                                   |
| 5   | 11.63_270.2154 | RP              | 1.98      | 1.72E-02 | ↑      | 3.34             | 270.2342      | 69.57           | Retinol metabolism                |
| 6   | 11.35_133.1127 | RP              | 1.85      | 2.50E-02 | ↓      | 0.34             | 133.0972      | 116.46          | Arginine and ornithine metabolism |
| 7   | 11.58_121.102  | RP              | 1.54      | 3.07E-02 | ↑      | 8.11             |               |                 |                                   |
| 8   | 10.97_106.0885 | RP              | 1.53      | 4.25E-02 | ↓      | 0.73             |               |                 |                                   |
| 9   | 10.2_95.0765   | RP              | 1.34      | 4.65E-02 | ↑      | 2.60             |               |                 |                                   |
| 10  | 11.53_834.6856 | RP              | 1.30      | 3.95E-02 | ↑      | 61.76            |               |                 |                                   |
| 11  | 2.16_90.5248   | RP              | 1.29      | 4.76E-02 | -      | -                |               |                 |                                   |
| 12  | 11.36_145.0167 | RP              | 1.19      | 1.44E-02 | ↑      | 1.75             |               |                 |                                   |

|    |                |    |      |          |   |       |          |        |                                                                        |  |
|----|----------------|----|------|----------|---|-------|----------|--------|------------------------------------------------------------------------|--|
| 13 | 10.99_334.3113 | RP | 1.16 | 3.45E-02 | ↓ | 0.61  |          |        |                                                                        |  |
| 14 | 9.22_95.0809   | RP | 1.00 | 3.87E-02 | ↑ | 2.48  |          |        |                                                                        |  |
| 15 | 11.42_117.0732 | RP | 0.97 | 4.47E-02 | ↑ | 9.68  | 117.0546 | 158.90 | Arginine and<br>ornithine metabolism<br>Arachidonic acid<br>metabolism |  |
| 16 | 9.67_369.1706  | RN | 1.35 | 2.13E-02 | ↑ | 6.51  | 369.1838 | 35.75  |                                                                        |  |
| 17 | 11.5_685.5345  | RN | 1.35 | 5.63E-03 | ↑ | 11.66 |          |        |                                                                        |  |
| 18 | 0.82_313.0628  | RN | 0.98 | 4.40E-02 | ↑ | 2.20  | 313.1055 | 136.38 | Folate biosynthesis                                                    |  |

Table S4. Comparison of retinoid levels adjusted for gestational age between maternal plasma of term and preterm birth (TB, n = 39; PTB, n = 20).

| Metabolites                   | ANCOVA |                 |
|-------------------------------|--------|-----------------|
|                               | F      | <i>p</i> -value |
| Retinyl palmitate             | 5.916  | 0.018           |
| Retinol                       | 0.818  | 0.370           |
| At-Retinal                    | 7.080  | 0.010           |
| At-Retinoic acid              | 0.482  | 0.490           |
| 9- <i>cis</i> -Retinoic acid  | 4.015  | 0.050           |
| 13- <i>cis</i> -Retinoic acid | 18.059 | <0.0001         |

Statistical analysis were performed using analysis of covariance (ANCOVA).



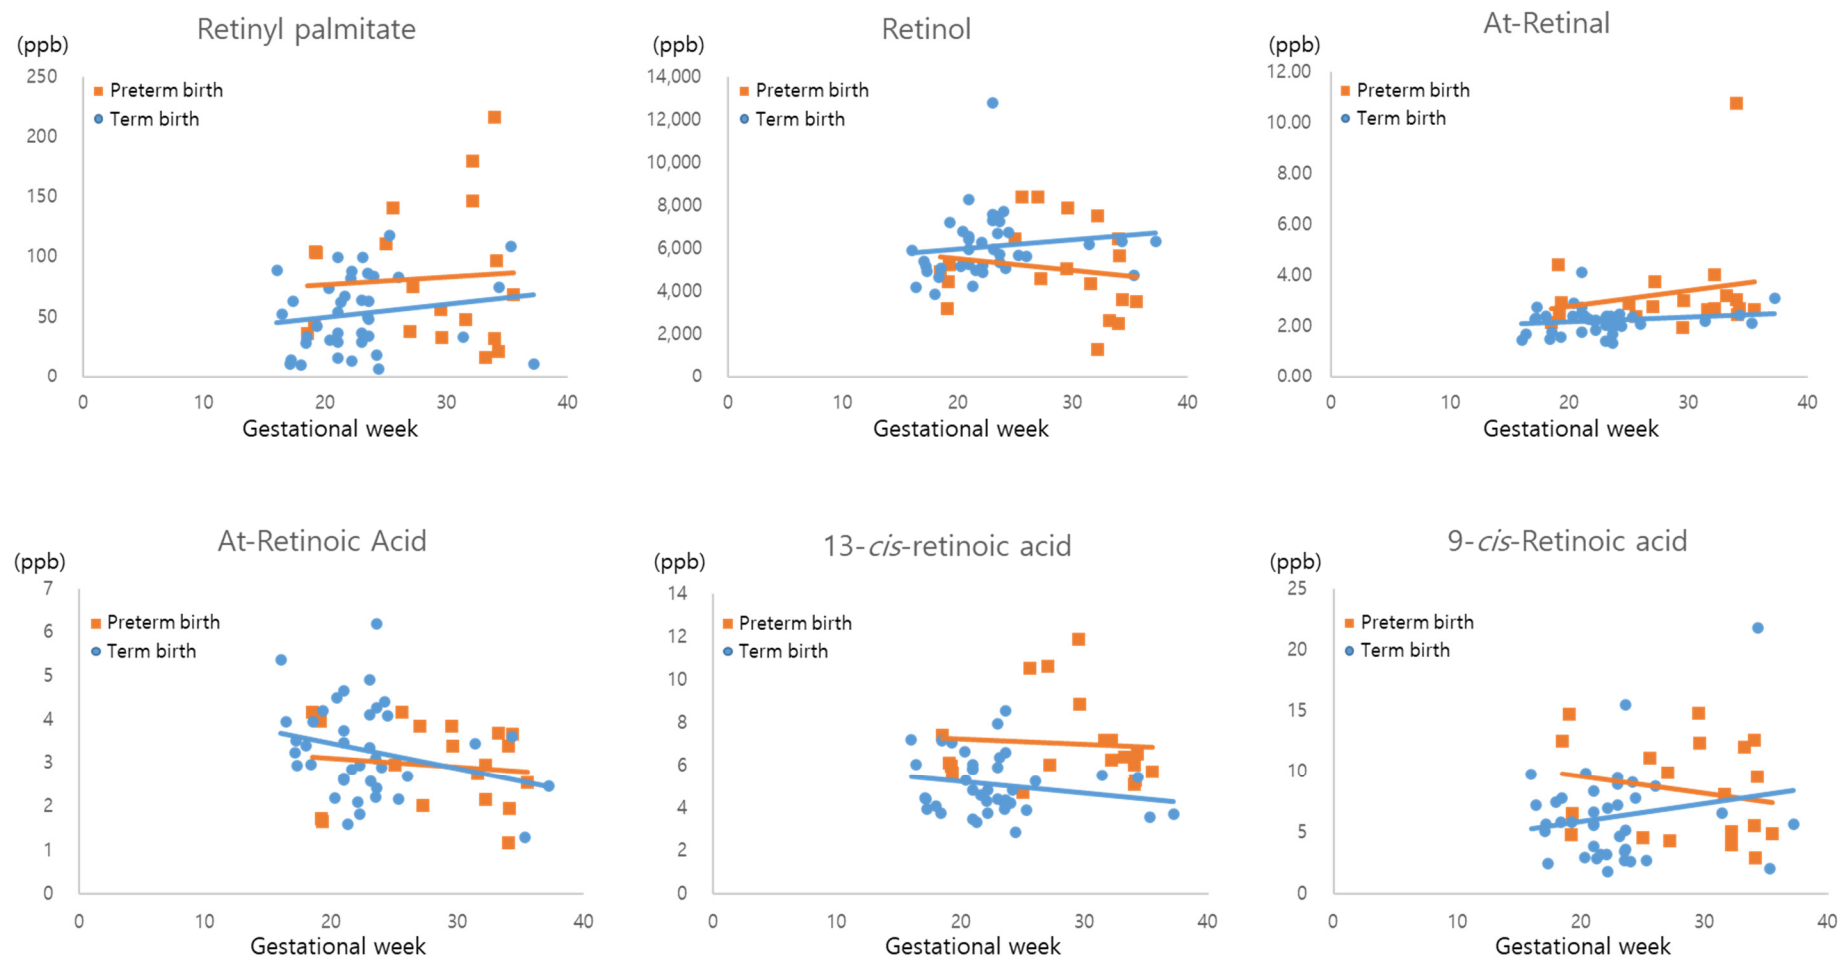

Figure S1. Changes in retinoid metabolites between the 2<sup>nd</sup> and 3<sup>rd</sup> trimester (TB, n=39; PTB, n=20). At : all trans.

Table S5. LC retention times, MRM transitions, and MS parameters of target analytes

| Analytes                        | R <sub>t</sub><br>(min) | polarity | Precursor<br>(m/z) | Product<br>(m/z) | Fragmentor<br>Energy (V) | Collision<br>Energy (V) |
|---------------------------------|-------------------------|----------|--------------------|------------------|--------------------------|-------------------------|
| <sup>13</sup> Cis-retinoic acid | 3.128                   | positive | 301.2              | 123.1            | 105                      | 12                      |
| <sup>9</sup> Cis-retinoic acid  | 3.334                   | positive | 301.2              | 123.1            | 105                      | 12                      |
| All-trans retinoic acid         | 3.530                   | positive | 301.1              | 159.1            | 115                      | 18                      |
| Retinoic acid-D6*               | 3.531                   | positive | 307.2              | 165.2            | 115                      | 18                      |
| All-trans retinal               | 4.679                   | positive | 285.2              | 161.1            | 115                      | 2                       |
| Retinal-D6*                     | 4.679                   | positive | 291.2              | 69               | 95                       | 22                      |
| Retinol                         | 3.674                   | positive | 269.2              | 93.1             | 115                      | 18                      |
| Retinol-D6*                     | 3.674                   | positive | 275.2              | 96               | 110                      | 14                      |
| Retinyl acetate                 | 6.889                   | positive | 269.2              | 96               | 108                      | 21                      |
| Retinyl acetate-D6*             | 6.889                   | positive | 275.2              | 96               | 115                      | 16                      |
| Retinyl palmitate               | 13.982                  | positive | 269.1              | 96               | 111                      | 21                      |

\* Internal standards



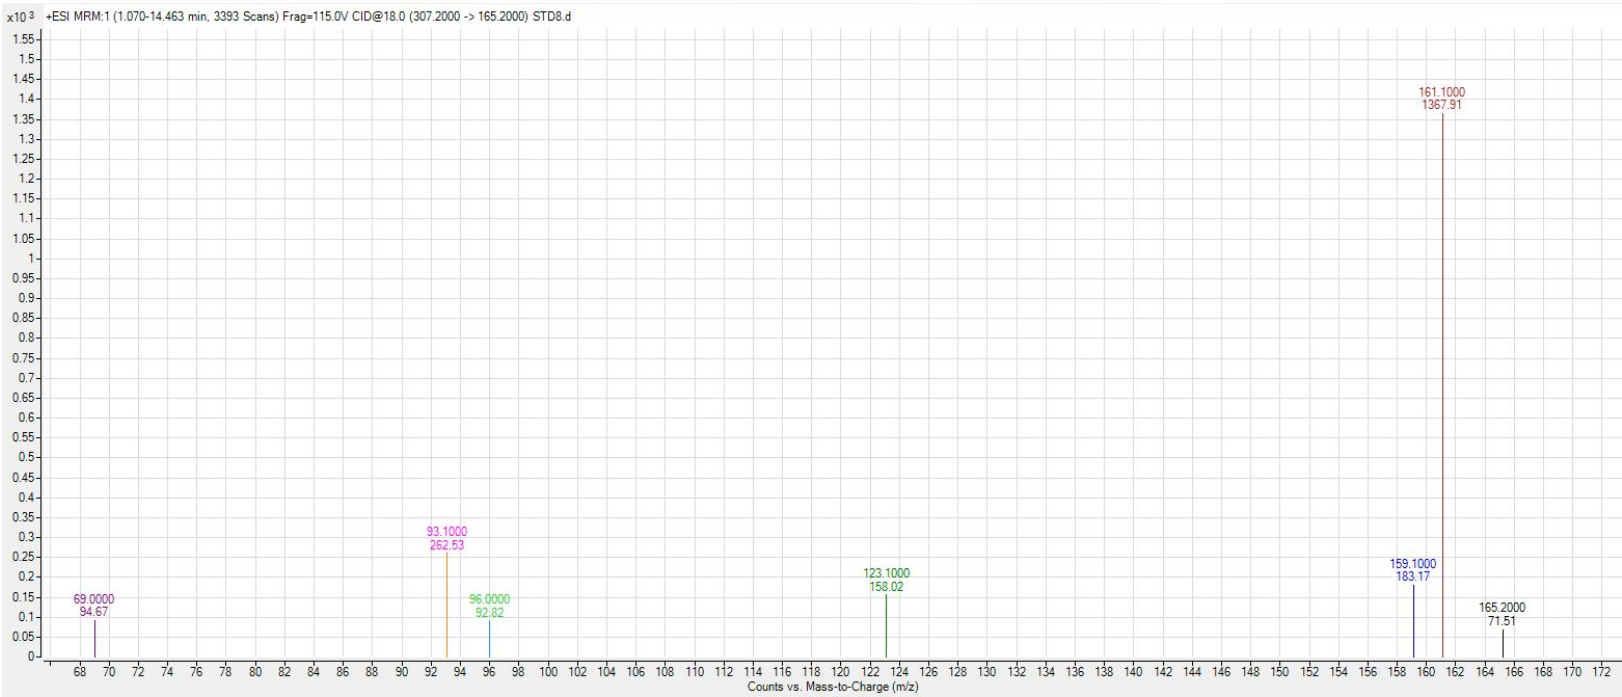

Figure S2. Representative LC-MS/MS spectra obtained from the blood sample.
